# Supplementary material
Source: PubMed Central journal article supplement (PMC5382020)
Supplement: NIHMS854529-supplement-Table_and_Note.pdf [file NIHMS854529-supplement-Table_and_Note.pdf]

**Supplementary Table 1. Anomalous data collection statistics**

|                                      | Br-soak <sup>‡</sup>              | Native ( $\lambda = 1.31 \text{ \AA}$ ) <sup>‡</sup> | Native ( $\lambda = 1.77 \text{ \AA}$ ) <sup>*</sup> |
|--------------------------------------|-----------------------------------|------------------------------------------------------|------------------------------------------------------|
| <b>Data collection</b>               |                                   |                                                      |                                                      |
| Space group                          | C2                                | C2                                                   | C2                                                   |
| Cell dimensions                      |                                   |                                                      |                                                      |
| a, b, c ( $\text{\AA}$ )             | 93.92, 100.37, 75.15              | 90.69, 100.00, 75.6                                  | 93.73, 99.38, 74.71                                  |
| $\alpha, \beta, \gamma$ ( $^\circ$ ) | 90, 112.74, 90                    | 90, 106.61, 90                                       | 90, 112.72, 90                                       |
| Wavelength ( $\text{\AA}$ )          | 0.9197                            | 1.3106                                               | 1.7712                                               |
| Resolution ( $\text{\AA}$ )          | 100–2.51 (2.60–2.51) <sup>a</sup> | 100–2.50 (2.59–2.50) <sup>a</sup>                    | 100–2.50 (2.59–2.50) <sup>a</sup>                    |
| $R_{\text{pim}}$ (%)                 | 9.2 (65.2)                        | 3.0 (14.7)                                           | 4.0 (11.8)                                           |
| $I/\sigma(I)$                        | 9.1 (2.0)                         | 13.8 (3.3)                                           | 22.0 (7.4)                                           |
| $CC_{1/2}$                           | 0.99 (0.30)                       | 1.00 (0.95)                                          | 1.00 (0.96)                                          |
| Completeness (%)                     | 97.3 (88.8)                       | 99.2 (97.7)                                          | 100 (100)                                            |
| Redundancy                           | 3.0 (2.4)                         | 6.5 (5.4)                                            | 14.6 (12.7)                                          |

<sup>\*</sup> Merged from 3 native crystals grown in LCP.

<sup>‡</sup> From single crystal grown in LCP.

<sup>a</sup> Values in parentheses are for highest-resolution shell.



**Supplementary Note 1. Alignment of MurJ sequences.** Positions shaded in red are identical in >90% of Gram-negative MurJ sequences in an alignment with 36 sequences, while those shaded gray are similar in >70% of the sequences. Asterisks (\*) denote residues in MurJ<sub>TA</sub> of which alanine mutants fail to complement (residue number is shown next to the asterisk). Carets (^) denote residues in *E. coli* MurJ of which cysteine mutants fail to complement upon MTSES treatment (Sham, L.-T. *et al.*, Science. 345(6193), 220–222, 2014). To generate this alignment, MurJ<sub>TA</sub> from *Thermosipho africanus* (UniProt ID: B7IE18) was aligned with 36 representative Gram-negative MurJ sequences from the UniRef50 library (no representative sequence is more than 50% identical to another). MATE transporters PfMATE and NorM-NG were also included in the alignment.

List of sequences shown: MurJ-TA, *Thermosipho africanus* (UniProt ID: B7IE18); MurJ-EC, *Escherichia coli* (P0AF16); MurJ-PF, *Pseudomonas fluorescens* (G8PWV6); MurJ-VC, *Vibrio cholerae* (O34238); MurJ-LI, *Leptospira interrogans* (A0A0C5X9A5); MurJ-RS, *Rhodobacter sphaeroides* (Q3J5H7); PfMATE (PDB ID: 3VVN); NorM-NG (4HUK).
